# Supplementary material for: Hypoglycemic effects and associated mechanisms of resveratrol and related stilbenes in diet
Source: Royal Society of Chemistry journal article supplement (doi:10.1039/d3fo04761j), 2024-01-01
Supplement: d3fo04761j1.pdf [file d3fo04761j1.pdf]

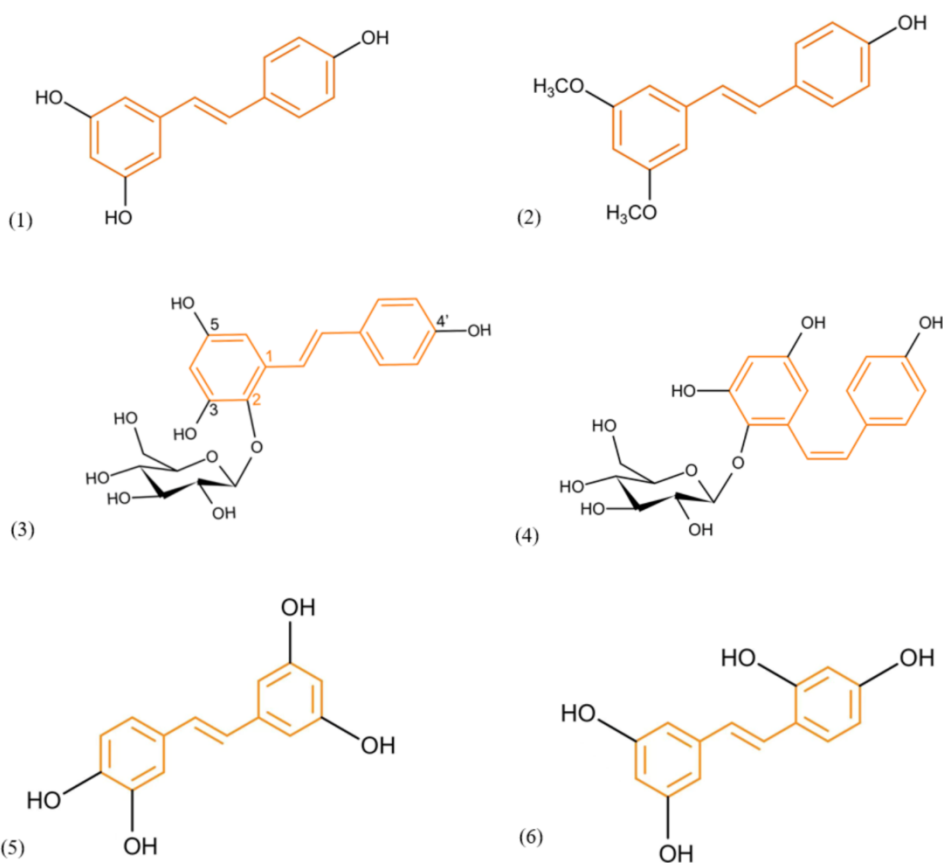

Figure S1. Chemical structures for resveratrol (1), pterostilbene (2), *trans*-THSG (3), *cis*-THSG (4), piceatannol (5) and oxyresveratrol (6).
